# Supplementary material for: Mitochondrial DNA Copy-Number Variation and Pancreatic Cancer Risk in the Prospective EPIC Cohort
Source: Oxford University Press journal article supplement (doi:10.1158/1055-9965.epi-19-0868), 2020-01-13
Supplement: 10559965epi190868-sup-226036_2_supp_5951130_q2hvlh.docx [file 10559965epi190868-sup-226036_2_supp_5951130_q2hvlh.docx]

**Supplementary Table 1.** Association between mtDNA copy number and PDAC risk factors.

| **Variable** | **Coeff.*** | **95% C.I.** | **P-value** |
| --- | --- | --- | --- |
| Age (expressed in years) | -0.03 | -0.04, -0.01 | **0.005** |
| - Age >60years vs <60years | -0.62 | -0.92, -0.31 | **6.54×10-5** |
| Sex | -0.26 | -0.56, 0.04 | 0.089 |
| BMI | -0.29 | -0.49, -0.10 | **0.004** |
| - healthy weight vs underweight | -0.92 | -1.83, -0.11 | **0.047** |
| - overweight vs underweight | -1.13 | -2.04, -0.22 | **0.015** |
| - obese vs underweight | -1.41 | -2.37, -0.45 | **0.004** |
| - underweight vs healthy weight | 0.92 | 0.01, 1.83 | **0.047** |
| - obese vs healthy weight | -0.49 | -0.93, -0.04 | **0.033** |
| Alcohol (no/yes) | -0.53 | -1.09, 0.03 | 0.065 |
| Smoking (no/yes) | -0.19 | -0.66, 0.29 | 0.439 |
| Smoking (never; former; current) | -0.12 | -0.33, 0.10 | 0.293 |
| Diabetes (no/yes) | -0.79 | -1.58, 0.01 | 0.051 |

* regression coefficient.

Body mass index (BMI) was divided in four class: underweight (BMI<19); normal weight ((19≤BMI<25); overweight (25≤BMI<30); obese (BMI≥30); For sex the reference class is females and risk is referred to males.
