# Supplementary material for: Mitochondrial DNA Copy-Number Variation and Pancreatic Cancer Risk in the Prospective EPIC Cohort
Source: Oxford University Press journal article supplement (doi:10.1158/1055-9965.epi-19-0868), 2020-01-13
Supplement: 10559965epi190868-sup-226036_2_supp_5951131_q2mvlm.docx [file 10559965epi190868-sup-226036_2_supp_5951131_q2mvlm.docx]

**Supplementary Table 2**. Association between mtDNA copy number and pancreatic cancer adjusted for diabetes condition and smoking status.

|  | **Controls** | **Cases** | **Total** | **OR** | **95% C.I.** | **P-value** |
| --- | --- | --- | --- | --- | --- | --- |
| **Adjusted by diabetes** | | | | | | |
| **Unconditional analysis** |  |  |  |  |  |  |
| Continuous variable log-trasformed | 226 | 221 | 447 | 0.68 | 0.38; 1.22 | 0.197 |
| Continuous variable expressed in quintiles | 226 | 221 | 447 | 0.91 | 0.73 ;1.13 | 0.389 |
| 1st quintile | 67 | 65 | 132 | ref | - | - |
| 2nd quintile | 53 | 59 | 112 | 1.18 | 0.68; 2.08 | 0.553 |
| 3rd quintile | 46 | 51 | 97 | 1.06 | 0.58; 1.96 | 0.844 |
| 4th quintile | 31 | 20 | 51 | 0.44 | 0.18; 1.09 | 0.076 |
| 5th quintile | 29 | 26 | 55 | 0.67 | 0.26; 1.77 | 0.421 |
|  |  |  |  |  |  |  |
| **Conditional analysis** |  |  |  |  |  |  |
| Continuous variable log-trasformed | 200 | 200 | 400 | 0.52 | 0.26; 1.05 | 0.067 |
| Continuous variable expressed in quintiles | 200 | 200 | 400 | 0.83 | 0.64; 1.07 | 0.154 |
| 1st quintile | 55 | 57 | 112 | ref |  |  |
| 2nd quintile | 47 | 47 | 94 | 0.92 | 0.49; 1.72 | 0.799 |
| 3rd quintile | 38 | 48 | 86 | 1.01 | 0.52; 1.98 | 0.972 |
| 4th quintile | 28 | 20 | 48 | 0.28 | 0.09; 0.91 | **0.034** |
| 5th quintile | 32 | 28 | 60 | 0.30 | 0.09; 1.01 | 0.052 |
|  |  |  |  |  |  |  |
| **Adjusted by smoking status (never;former;current)** | | | | | | |
| **Unconditional analysis** |  |  |  |  |  |  |
| Continuous variable log-trasformed | 267 | 385 | 652 | 0.62 | 0.35; 1.11 | 0.107 |
| Continuous variable expressed in quintiles | 267 | 385 | 652 | 0.88 | 0.72; 1.09 | 0.255 |
| 1st quintile | 74 | 121 | 195 | ref |  |  |
| 2nd quintile | 62 | 101 | 163 | 1.10 | 0.65; 1.86 | 0.736 |
| 3rd quintile | 57 | 100 | 157 | 1.00 | 0.57; 1.77 | 0.990 |
| 4th quintile | 37 | 28 | 65 | 0.38 | 0.16; 0.90 | **0.029** |
| 5th quintile | 37 | 35 | 72 | 0.61 | 0.24; 1.55 | 0.303 |
|  |  |  |  |  |  |  |
| **Conditional analysis** |  |  |  |  |  |  |
| Continuous variable log-trasformed | 222 | 222 | 444 | 0.50 | 0.25; 0.99 | **0.049** |
| Continuous variable expressed in quintiles | 222 | 222 | 444 | 0.84 | 0.66; 1.06 | 0.145 |
| 1st quintile | 59 | 64 | 123 | ref |  |  |
| 2nd quintile | 55 | 52 | 107 | 0.89 | 0.50; 1.56 | 0.676 |
| 3rd quintile | 47 | 58 | 105 | 0.99 | 0.54; 1.81 | 0.972 |
| 4th quintile | 29 | 20 | 49 | 0.27 | 0.09; 0.84 | **0.024** |
| 5th quintile | 32 | 28 | 60 | 0.28 | 0.08; 0.93 | **0.038** |

Unconditional logistic regression performed using mitochondrial copy number variable (Pfaffl) categorized in quintiles and analyzed as continuous variable log-transformed, continuous variable divided in quintiles (whereby the unit of measurement is a single quintile). Analyses were adjusted for sex, age, BMI, plate recruitment center and separately the analysis were adjusted for diabetes condition and smoking status. Individual matching in conditional analysis was done by center, gender, age at recruitment (±6 months), date at entry in the cohort, time between blood sampling, and time of last consumption of food and drink (<3, 3-6, and ≥6 hours). This analysis was adjusted for plate and BMI.
