# Supplementary material for: Mitochondrial DNA Copy-Number Variation and Pancreatic Cancer Risk in the Prospective EPIC Cohort
Source: Oxford University Press journal article supplement (doi:10.1158/1055-9965.epi-19-0868), 2020-01-13
Supplement: 10559965epi190868-sup-226036_2_supp_5951132_q2zvlz.docx [file 10559965epi190868-sup-226036_2_supp_5951132_q2zvlz.docx]

**Supplementary Table 3**. Association between mtDNA copy number and pancreatic cancer adjusted for number of cigarette packs smoking for year .

|  | **Controls** | **Cases** | **Total** | **OR** | **95% C.I.** | **P-value** |
| --- | --- | --- | --- | --- | --- | --- |
| **Smoking (pack-years)** | | | | | | |
| Continuous variable log-transformed | 111 | 120 | 231 | 0.90 | 0.65; 1.25 | 0.544 |
| Continuous variable expressed in quintiles | 111 | 120 | 231 | 0.76 | 0.29; 1.97 | 0.569 |
| 1st quintile | 37 | 40 | 77 | ref |  |  |
| 2nd quintile | 29 | 38 | 67 | 1.08 | 0.52; 2.28 | 0.829 |
| 3rd quintile | 29 | 27 | 56 | 0.72 | 0.32; 1.63 | 0.435 |
| 4th quintile | 10 | 7 | 17 | 0.63 | 0.14; 1.93 | 0.559 |
| 5th quintile | 6 | 8 | 14 | 1.03 | 0.17; 6.12 | 0.973 |

Unconditional logistic regression performed using mitochondrial copy number variable (Pfaffl) categorized in quintiles and analyzed as continuous variable log-transformed and continuous variable divided in quintiles (whereby the unit of measurement is a single quintile). Analyses were adjusted for sex, age, BMI, plate recruitment center and cigarettes smoking packs.
