# Supplementary material for: Mitochondrial DNA Copy-Number Variation and Pancreatic Cancer Risk in the Prospective EPIC Cohort
Source: Oxford University Press journal article supplement (doi:10.1158/1055-9965.epi-19-0868), 2020-01-13
Supplement: 10559965epi190868-sup-226036_2_supp_5951133_q26vlb.docx [file 10559965epi190868-sup-226036_2_supp_5951133_q26vlb.docx]

**Supplementary Table 4** Analyses stratified by lag time between blood collection and diagnosis of pancreatic cancer (<7 years, ≥7 years)

|  | **Controls** | **Cases** | **Total** | **OR** | **95% C.I.** | **P-value** |
| --- | --- | --- | --- | --- | --- | --- |
| **Conditional analysis cases <7 years from diagnosis** | | | | | | |
| Continuous variable log-transformed | 136 | 136 | 272 | 0.58 | 0.25; 1.33 | 0.198 |
| Continuous variable expressed in quintiles | 136 | 136 | 272 | 0.83 | 0.62; 1.12 | 0.219 |
| 1st quintile | 41 | 48 | 89 | ref |  |  |
| 2nd quintile | 42 | 37 | 79 | 0.73 | 0.37; 1.44 | 0.369 |
| 3rd quintile | 26 | 30 | 56 | 0.92 | 0.45; 1.88 | 0.820 |
| 4th quintile | 14 | 9 | 23 | 0.20 | 0.04; 1.05 | 0.057 |
| 5th quintile | 13 | 12 | 25 | 0.23 | 0.04; 1.40 | 0.110 |
|  |  |  |  |  |  |  |
|  |  |  |  |  |  |  |
| **Conditional analysis cases ≥7 years from diagnosis** | | | | | | |
| Continuous variable log-transformed | 74 | 74 | 148 | 0.47 | 0.15; 1.52 | 0.208 |
| Continuous variable expressed in quintiles | 74 | 74 | 148 | 0.83 | 0.54; 1.28 | 0.402 |
| 1st quintile | 17 | 14 | 31 | ref |  |  |
| 2nd quintile | 8 | 11 | 19 | 1.96 | 0.50; 7.76 | 0.336 |
| 3rd quintile | 17 | 24 | 41 | 1.99 | 0.50; 7.93 | 0.332 |
| 4th quintile | 14 | 11 | 25 | 0.53 | 0.08; 3.27 | 0.495 |
| 5th quintile | 18 | 14 | 32 | 0.47 | 0.07; 3.20 | 0.443 |
|  |  |  |  |  |  |  |

Unconditional logistic regression performed using mitochondrial copy number variable (Pfaffl) categorized in quintiles and analyzed as continuous variable log-transformed and continuous variable divided in quintiles (whereby the unit of measurement is a single quintile). Analyses were adjusted for sex, age, BMI, plate and recruitment center. Individual matching in conditional analysis was done by center, gender, age at recruitment (±6 months), date at entry in the cohort, time between blood sampling, and time of last consumption of food and drink (<3, 3-6, and ≥6 hours). This analysis was adjusted for plate and BMI.
