# Supplementary material for: Mitochondrial DNA Copy-Number Variation and Pancreatic Cancer Risk in the Prospective EPIC Cohort
Source: Oxford University Press journal article supplement (doi:10.1158/1055-9965.epi-19-0868), 2020-01-13
Supplement: 10559965epi190868-sup-226036_2_supp_5951134_q2qvlb.docx [file 10559965epi190868-sup-226036_2_supp_5951134_q2qvlb.docx]

**Supplementary Table 5**. Association between mtDNA copy number and pancreatic cancer stratified by smoking status.

|  | **Controls** | **Cases** | **Total** | **OR** | **95% C.I.** | **P-value** |
| --- | --- | --- | --- | --- | --- | --- |
| **Male smokers** |  |  |  |  |  |  |
| Continuous variable log-trasformed | 80 | 77 | 157 | 0.92 | 0.28; 2.99 | 0.887 |
| Continuous variable expressed in quintiles | 80 | 77 | 157 | 0.97 | 0.63; 1.49 | 0.892 |
| 1st quintile | 28 | 26 | 54 | ref. |  | - |
| 2nd quintile | 16 | 20 | 36 | 1.27 | 0.45; 3.54 | 0.650 |
| 3rd quintile | 21 | 19 | 40 | 1.00 | 0.37; 2.73 | 0.994 |
| 4th quintile | 9 | 6 | 15 | 0.56 | 0.08; 3.76 | 0.554 |
| 5th quintile | 6 | 6 | 12 | 1.03 | 0.10; 11.00 | 0.981 |
|  |  |  |  |  |  |  |
| **Female smokers** |  |  |  |  |  |  |
| Continuous variable log-trasformed | 54 | 65 | 119 | 0.06 | 0.04; 1.08 | 0.061 |
| Continuous variable expressed in quintiles | 54 | 65 | 119 | 0.68 | 0.40; 1.14 | 0.146 |
| 1st quintile | 10 | 16 | 26 | ref. |  | - |
| 2nd quintile | 17 | 20 | 37 | 0.48 | 0.14; 1.68 | 0.249 |
| 3rd quintile | 14 | 13 | 27 | 0.24 | 0.06; 1.08 | 0.063 |
| 4th quintile | 6 | 3 | 9 | 0.16 | 0.01; 1.74 | 0.132 |
| 5th quintile | 7 | 13 | 20 | 0.44 | 0.04; 4.59 | 0.490 |
|  |  |  |  |  |  |  |
| **Ever smokers (both sexes)** |  |  |  |  |  |  |
| Continuous variable log-transformed | 134 | 142 | 276 | 0.79 | 0.33; 1.86 | 0.585 |
| Continuous variable expressed in quintiles | 134 | 142 | 276 | 0.94 | 0.70; 1.26 | 0.668 |
| 1st quintile | 38 | 42 | 80 | ref. |  | - |
| 2nd quintile | 33 | 40 | 73 | 0.99 | 0.48; 2.03 | 0.979 |
| 3rd quintile | 35 | 32 | 67 | 0.73 | 0.34; 1.56 | 0.416 |
| 4th quintile | 15 | 9 | 24 | 0.47 | 0.12; 1.76 | 0.261 |
| 5th quintile | 13 | 19 | 32 | 1.38 | 0.32; 5.89 | 0.662 |
|  |  |  |  |  |  |  |
| **Never smokers (both sexes)** |  |  |  |  |  |  |
| Continuous variable log-transformed | 130 | 174 | 304 | 0.40 | 0.16; 0.97 | **0.043** |
| Continuous variable expressed in quintiles | 130 | 174 | 304 | 0.74 | 0.53; 1.05 | 0.094 |
| 1st quintile | 36 | 50 | 86 | ref |  |  |
| 2nd quintile | 29 | 46 | 75 | 0.87 | 0.35; 2.19 | 0.768 |
| 3rd quintile | 22 | 48 | 70 | 1.35 | 0.50; 3.65 | 0.553 |
| 4th quintile | 19 | 16 | 35 | 0.31 | 0.08; 1.22 | 0.093 |
| 5th quintile | 24 | 14 | 38 | 0.21 | 0.04; 1.00 | **0.050** |

Logistic regression performed using mitochondrial copy number variable (Pfaffl) categorized in quintiles and analyzed as continuous variable log-transformed, and continuous variable divided in quintiles (whereby the unit of measurement is a single quintile). Analyses were adjusted for age, BMI, plate and center of origin.
